# Supplementary material for: Enhanced photocatalytic and antibacterial activity of plasma-reduced silver nanoparticles
Source: Royal Society of Chemistry journal article supplement (doi:10.1039/c8ra03961e), 2018-01-01
Supplement: c8ra03961e1.pdf [file c8ra03961e1.pdf]

Electronic Supplementary Information (ESI)

## Enhanced photocatalytic and antibacterial activity of plasma reduced silver nanoparticles

L. Chandana<sup>a</sup>, P. Ghosal<sup>b</sup>, T. Shashidhar<sup>c</sup>, Ch. Subrahmanyam<sup>a,\*</sup>

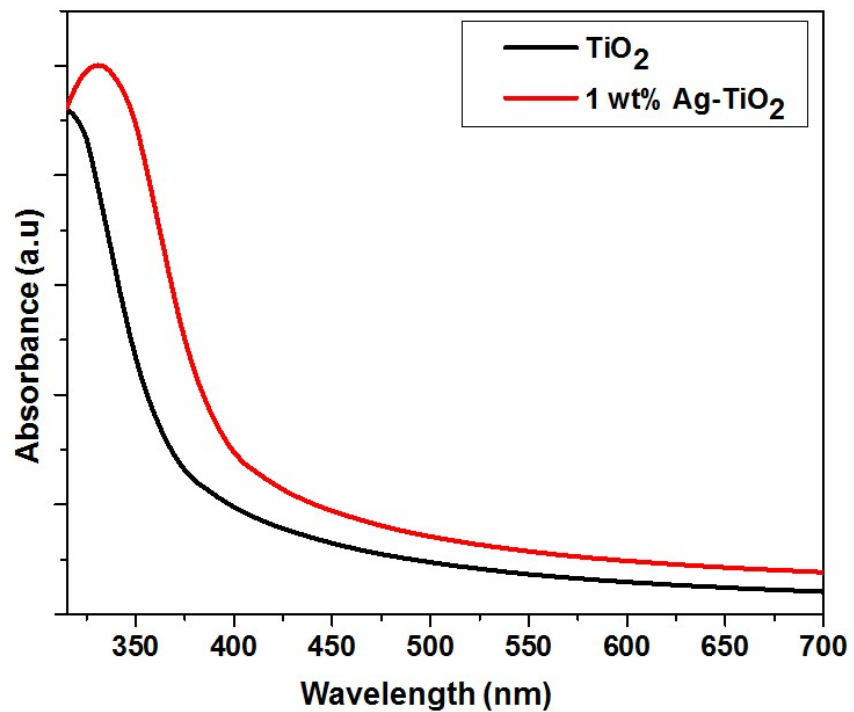

Fig.S1. UV-Vis absorbance spectra of TiO<sub>2</sub> and 1 wt% Ag-TiO<sub>2</sub>

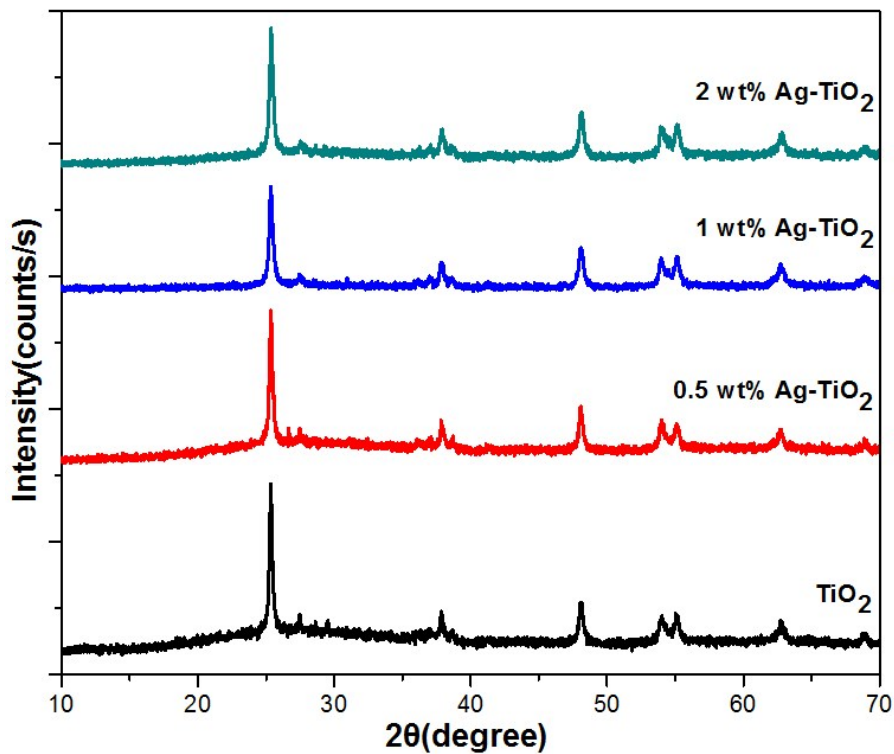

Fig.S2. X-Ray diffraction patterns of the TiO<sub>2</sub> and Ag loaded TiO<sub>2</sub> (0.5-2 wt%).

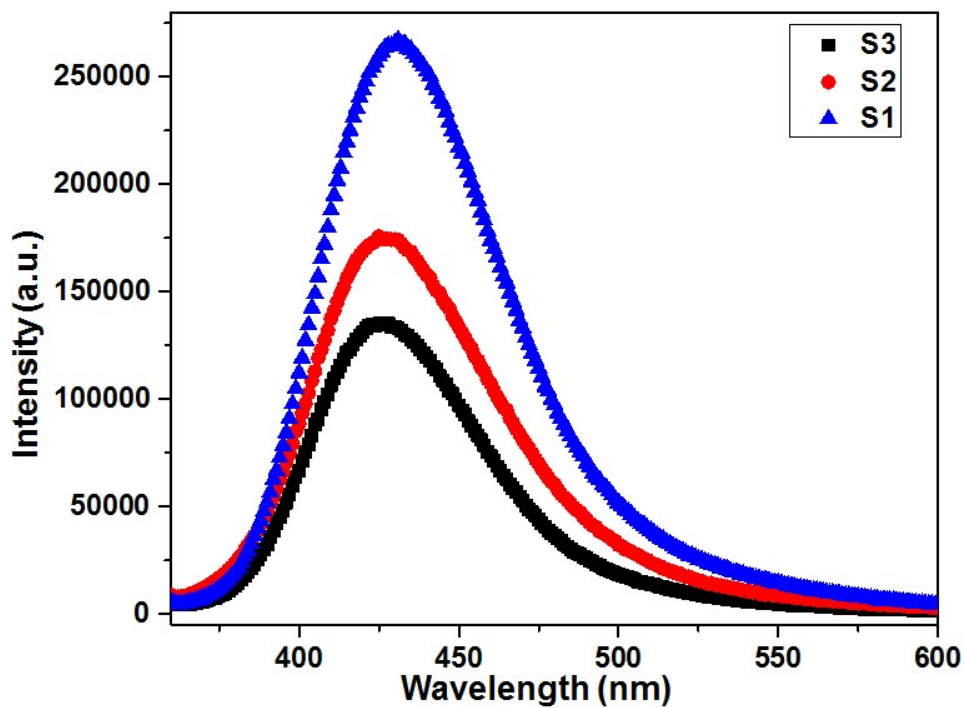

Fig.S3. ROS (\*OH) identification with various AgNPs (S1, S2 and S3).

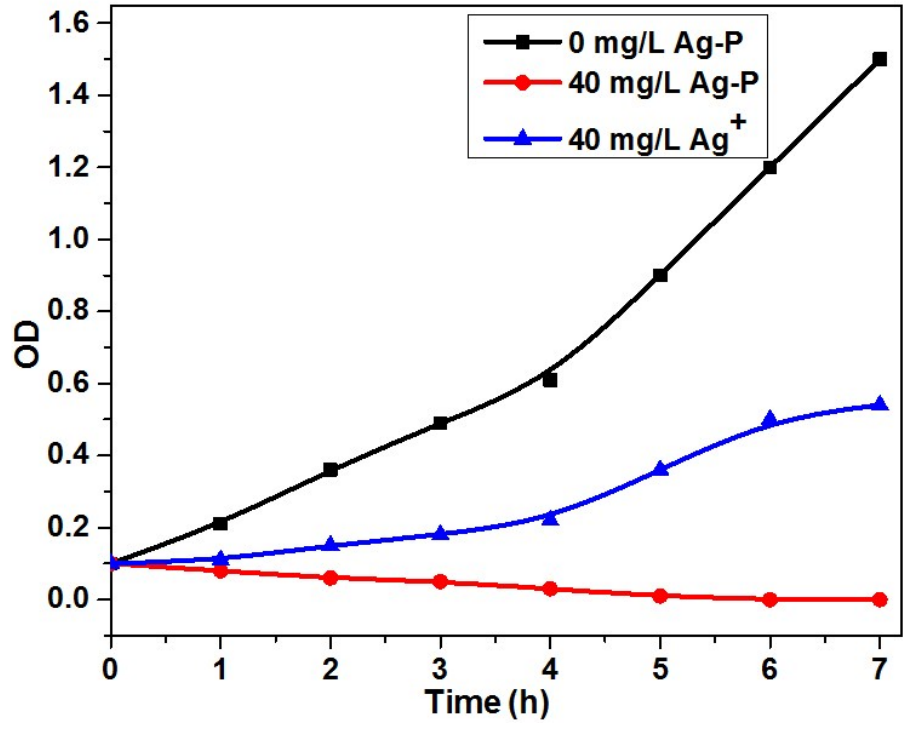

Fig.S4. Bacterial inactivation with Ag<sup>+</sup> ions and AgNPs.

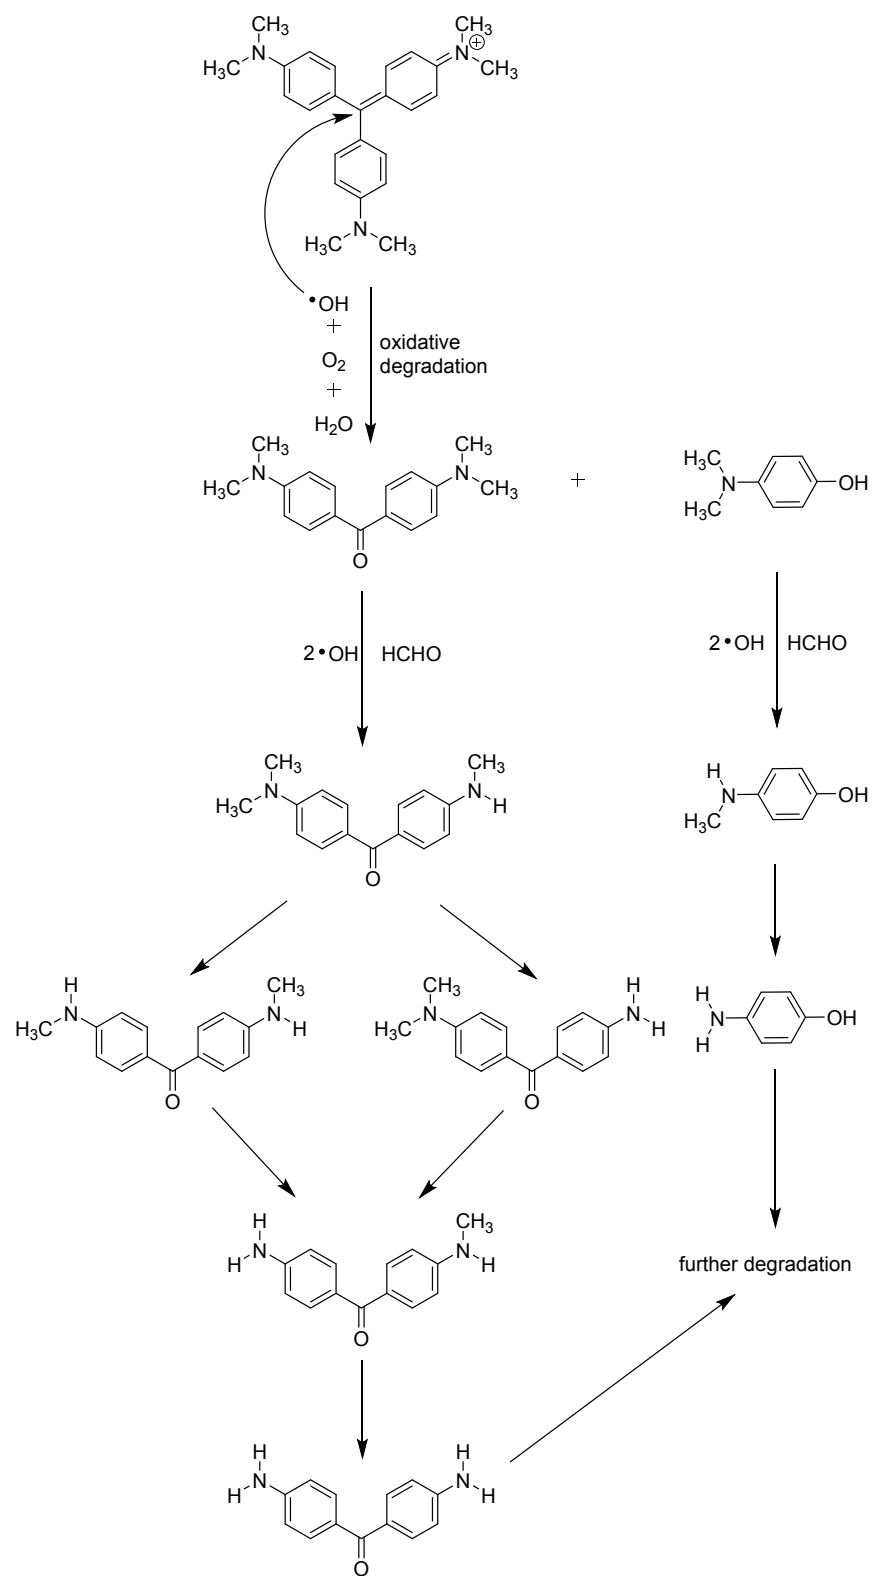

Fig.S5. A plausible mechanism of CV degradation
